# Supplementary material for: Octahedral molybdenum iodide clusters with pyrazole or pyrazolate ligands
Source: Royal Society of Chemistry journal article supplement (doi:10.1039/d4dt01831a), 2024-01-01
Supplement: d4dt01831a1.pdf [file d4dt01831a1.pdf]

# Octahedral molybdenum iodide clusters with pyrazole or pyrazolate ligands

Ksenia S. Kozlova,<sup>a,b</sup> Alexey S. Berezin,<sup>a</sup> Natalia V. Kuratieva,<sup>a</sup>  
Michael A. Shestopalov,<sup>a</sup> Anton A. Ivanov<sup>a\*</sup>

<sup>a</sup> Nikolaev Institute of Inorganic Chemistry SB RAS, 3 Acad. Lavrentiev Ave.,  
Novosibirsk 630090, Russian Federation.

<sup>b</sup> Novosibirsk State University, 2 Pirogov Str., 630090 Novosibirsk, Russian  
Federation.

\* Correspondence: [ivanov338@niic.nsc.ru](mailto:ivanov338@niic.nsc.ru)

## TABLE OF CONTENT

|                                                                      |    |
|----------------------------------------------------------------------|----|
| <b>Powder X-ray diffraction analysis data</b> .....                  | 3  |
| <b>Single-crystal X-ray diffraction data</b> .....                   | 4  |
| <b>Reactivity: <math>^1\text{H}</math> NMR data</b> .....            | 6  |
| <b>Luminesce in solution: <math>^1\text{H}</math> NMR data</b> ..... | 8  |
| <b>TGA data and FTIR spectra</b> .....                               | 9  |
| <b>Crystal structure data</b> .....                                  | 12 |
| <b>References</b> .....                                              | 13 |

## Powder X-ray diffraction analysis data

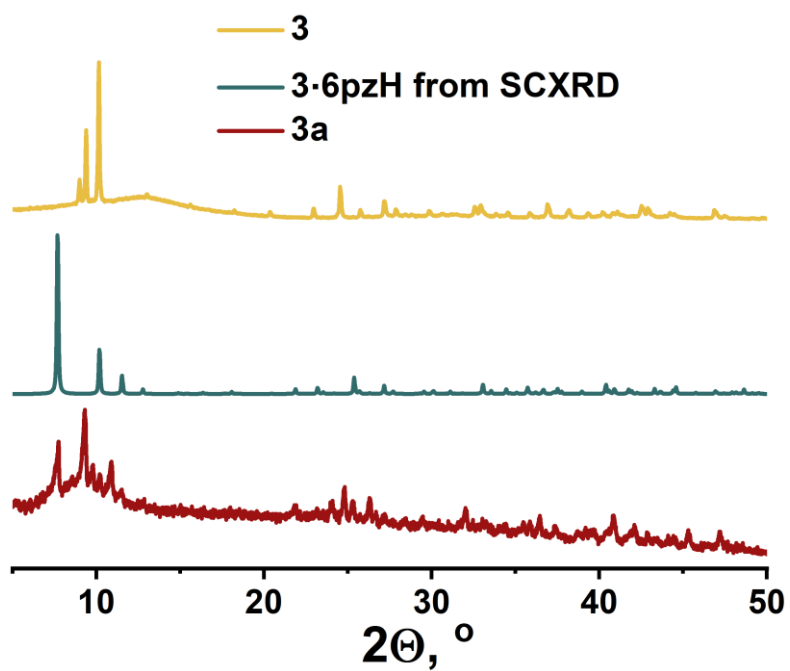

**Figure S1.** Powder X-ray diffraction patterns of **3** and **3a** in comparison with calculated one from the SCXRD data for **3·6pzH**.

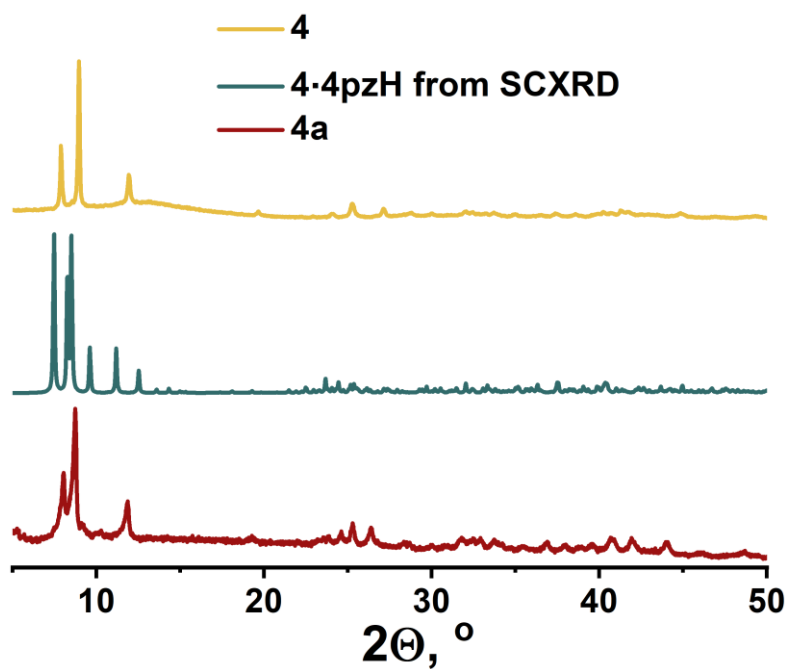

**Figure S2.** Powder X-ray diffraction patterns of **4** and **4a** in comparison with calculated one from the SCXRD data for **4·4pzH**.

## Single-crystal X-ray diffraction data

**Table S1.** Selected crystallographic parameters of the single-crystal X-ray diffraction structural analysis for  $K_2[Mo_6I_8(OH)_6] \cdot 13H_2O$  (**1·13H<sub>2</sub>O**),  $[Mo_6I_8(H_2O)_6](NO_3)_4 \cdot 2H_2O$  (**2·2H<sub>2</sub>O**),  $[K_2[Mo_6I_8(pz)_6] \cdot 6pzH$  (**3·6pzH**),  $[Mo_6I_8(pzH)_6](NO_3)_4 \cdot 4pzH$  (**4·4pzH**) in comparison with literature data.

| Cluster                                                                  | Mo–Mo distances, Å         | Mo–I distances, Å          | Mo–O distances, Å      | Mo–N distances, Å           | Ref       |
|--------------------------------------------------------------------------|----------------------------|----------------------------|------------------------|-----------------------------|-----------|
| <b>1·13H<sub>2</sub>O</b>                                                | 2.6536(5) –<br>2.6738(5)   | 2.7745(4) –<br>2.8147(4)   | 2.098(3) –<br>2.106(3) | –                           | This work |
| <b>2·2H<sub>2</sub>O</b>                                                 | 2.6469(7) –<br>2.6652(6)   | 2.7644(4) –<br>2.7852(4)   | 2.150(4) –<br>2.191(4) | –                           | This work |
| $[Mo_6I_8(H_2O)_2(OH)_4] \cdot 2H_2O$                                    | 2.6683(8)                  | 2.7896(7) –<br>2.8092(6)   | 2.125(4)               | –                           | 1         |
| $[Mo_6I_8(H_2O)_2(OH)_4] \cdot 12H_2O$                                   | 2.6623(5) –<br>2.6753(5)   | 2.7633(4) –<br>2.7923(4)   | 2.136(3)               | –                           | 1         |
| $[Mo_6I_8(H_2O)_2(OH)_4] \cdot 14H_2O$                                   | 2.6533(3) –<br>2.6730(3)   | 2.7723(3) –<br>2.8195(3)   | 2.085(2) –<br>2.175(2) | –                           | 1         |
| $[Mo_6I_8(H_2O)_4(OH)_2](NO_3)_2 \cdot 3H_2O$                            | 2.6509(4) –<br>2.6751(4)   | 2.7599(4) –<br>2.8049(4)   | 2.113(2) –<br>2.189(3) | –                           | 2         |
| $[Mo_6I_8(H_2O)_4(OH)_2](OTs)_2 \cdot 2H_2O$                             | 2.647(1) –<br>2.662(1)     | 2.781(1) –<br>2.801(1)     | 2.053(7) –<br>2.175(8) | –                           | 2         |
| <b>3·6pzH</b>                                                            | 2.6677(4) –<br>2.6808(4)   | 2.7687(4) –<br>2.7801(3)   | –                      | 2.186(3)                    | This work |
| <b>4·4pzH</b>                                                            | 2.6757(3) –<br>2.6819(3)   | 2.7522(3) –<br>2.7782(3)   | –                      | 2.216(2) –<br>2.235(2)      | This work |
| $(Bu_4N)_2[Mo_6I_8(trz)_6]$                                              | 2.6645(19) –<br>2.6973(19) | 2.7479(19) –<br>2.7921(18) | –                      | 2.158(13)<br>–<br>2.210(14) | 3         |
| $Cs_{0.27}[Mo_6I_8(trz)I_5]_{0.27} \cdot cis-[Mo_6I_8(trz)_2I_4]_{0.73}$ | 2.665(10) –<br>2.688(8)    | 2.752(7) –<br>2.791(10)    | –                      | 2.21(2)                     | 4         |
| $(Bu_4N)_2[Mo_6I_8(N_3C_2(COOCH_3)_2)_6]$                                | 2.6721(7) –<br>2.6794(6)   | 2.7588(6) –<br>2.7815(6)   | –                      | 2.183(5) –<br>2.220(4)      | 5         |
| $(Bu_4N)_2[Mo_6I_8(N_4C-Ph)_6]$                                          | 2.6728(10) –<br>2.6856(9)  | 2.7588(8) –<br>2.7768(9)   | –                      | 2.230(8) –<br>2.238(9)      | 6         |

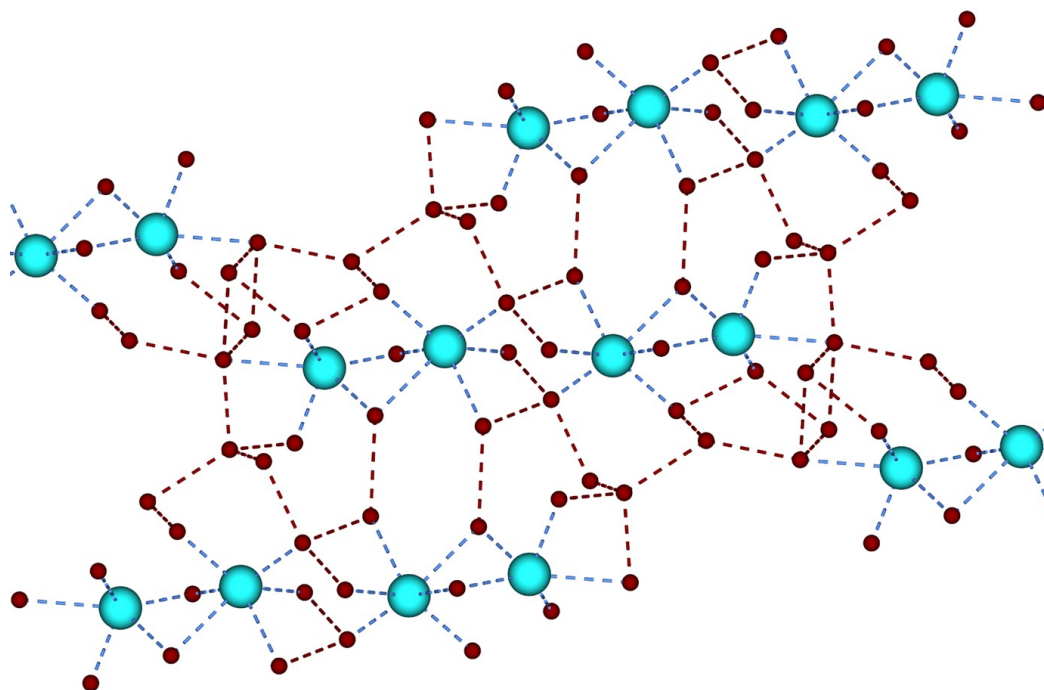

**Figure S3.** Packing of potassium cations in the layers in the crystal structure of **1·13H<sub>2</sub>O**. Color code: O – red, K – cyan, O···O – dashed red, O···K – dashed blue.

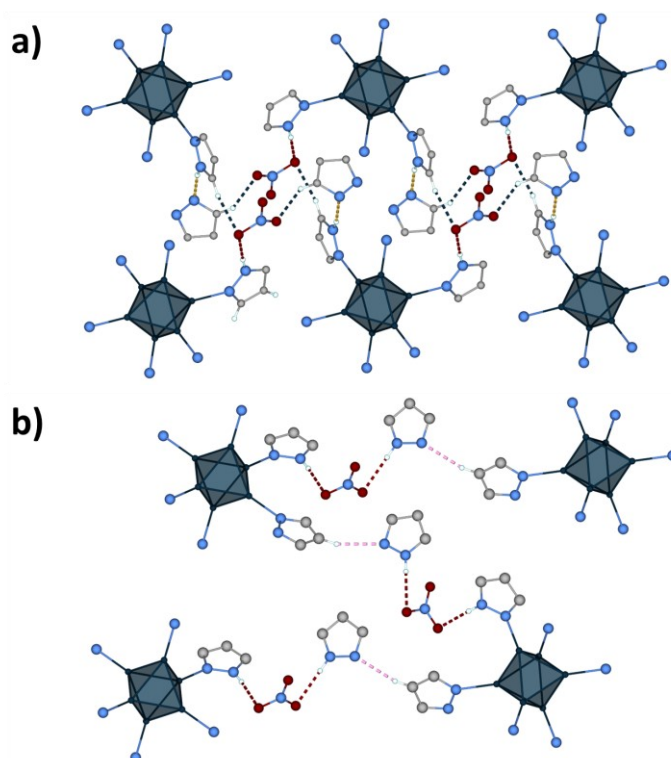

**Figure S4.** Packing in the crystal structure of **4·4pzH**: a) hydrogen bonds forming the layers, b) hydrogen bonds between layers. Color code: Mo – dark blue, N – light blue, O – red, C – gray, H – white, N···H-N – dashed yellow, O···H-N – dashed red, O···H-C – dashed blue, N···H-C – dashed pink.

## Reactivity: $^1\text{H}$ NMR data

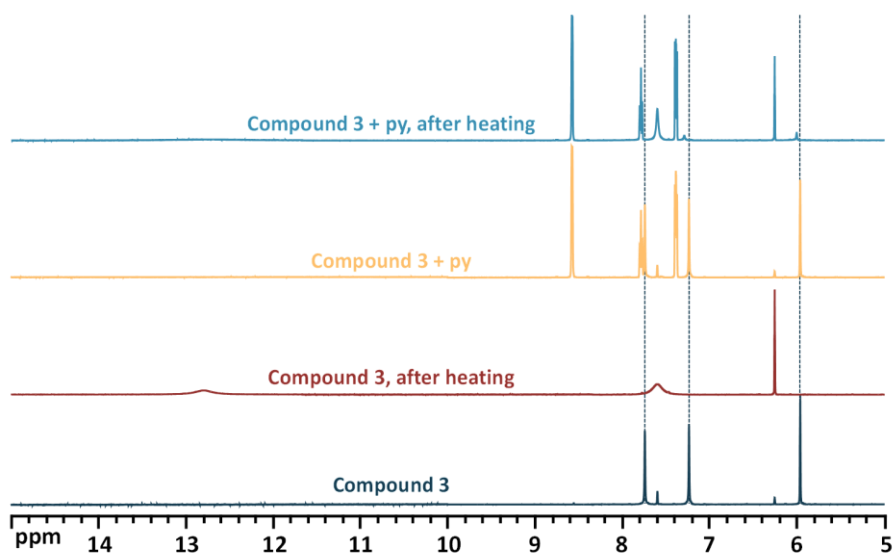

**Figure S5.**  $^1\text{H}$  NMR spectra of compound **3** in  $\text{DMSO-d}_6$  in presence of competing ligands (py = pyridine) and/or under heating at  $100^\circ\text{C}$  for 4 h.

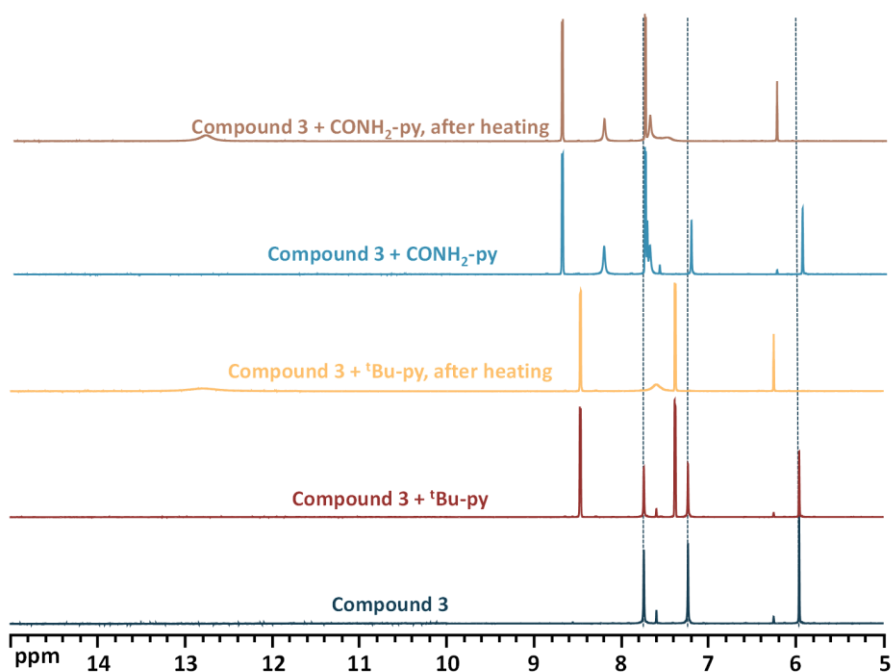

**Figure S6.**  $^1\text{H}$  NMR spectra of compound **3** in  $\text{DMSO-d}_6$  in presence of competing ligands ( $^t\text{Bu}$ -py = 4-tert-butylpyridine,  $\text{CONH}_2$ -py = isonicotinamide) and under heating at  $100^\circ\text{C}$  for 4 h.

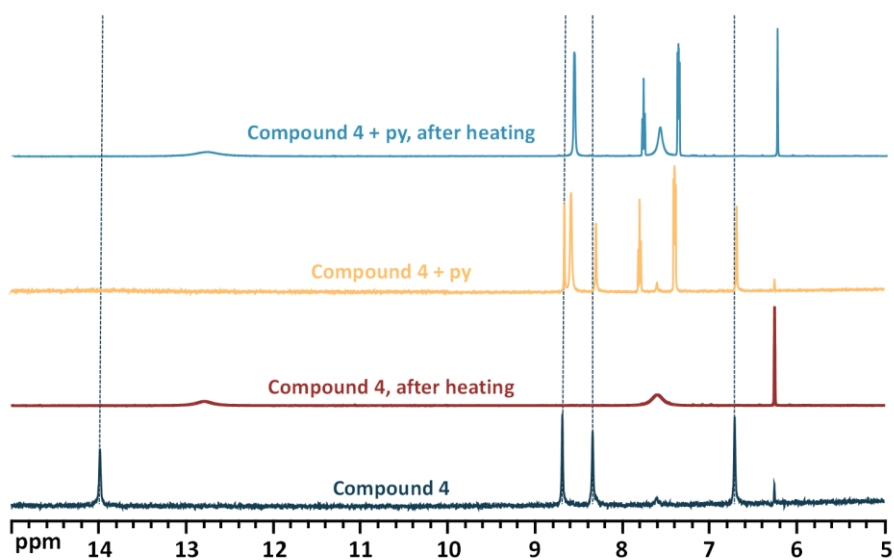

**Figure S7.**  $^1\text{H}$  NMR spectra of compound **4** in  $\text{DMSO-d}_6$  in presence of competing ligands (py = pyridine) and/or under heating at  $100^\circ\text{C}$  for 4 h.

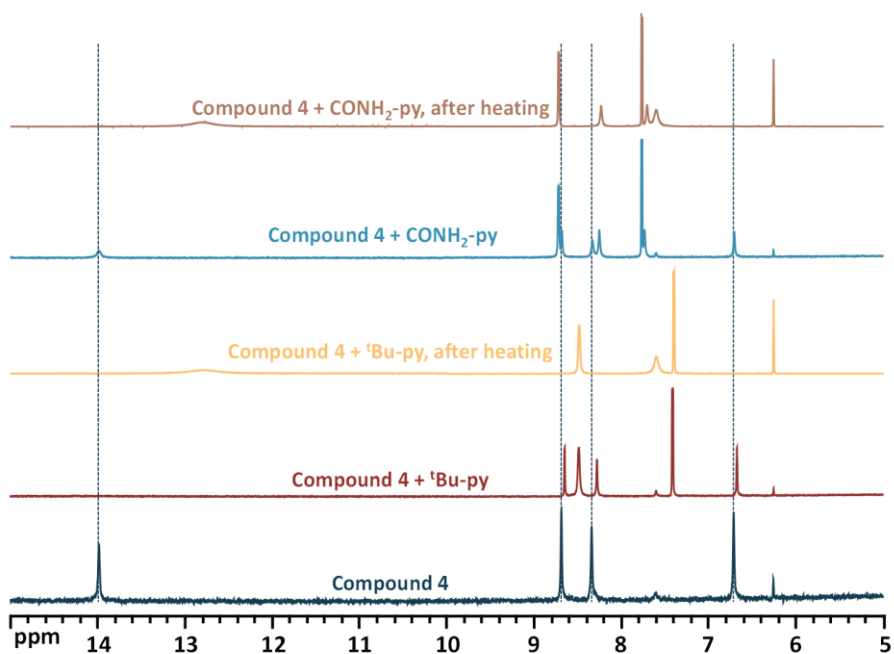

**Figure S8.**  $^1\text{H}$  NMR spectra of compound **4** in  $\text{DMSO-d}_6$  in presence of competing ligands ( $t\text{Bu-py}$  = 4-tert-butylpyridine,  $\text{CONH}_2\text{-py}$  = isonicotinamide) and under heating at  $100^\circ\text{C}$  for 4 h.

## Luminescence in solution: $^1\text{H}$ NMR data

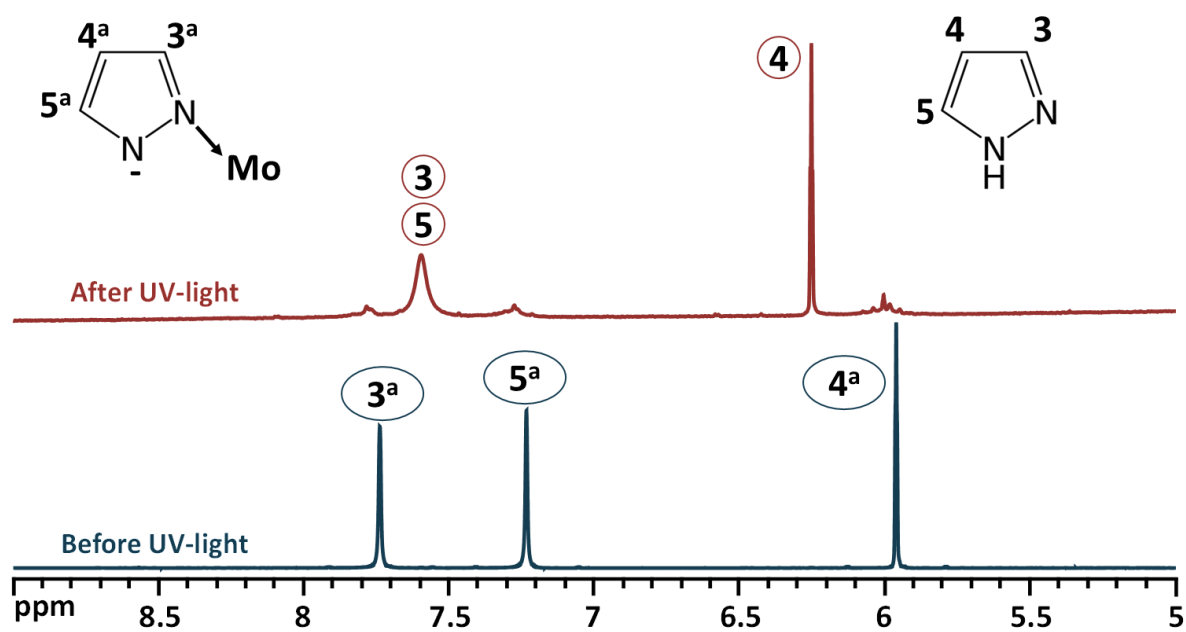

**Figure S9.**  $^1\text{H}$  NMR spectra of DMSO- $d_6$  solution of compound **3** before and after UV irradiation ( $\lambda = 365$  nm).

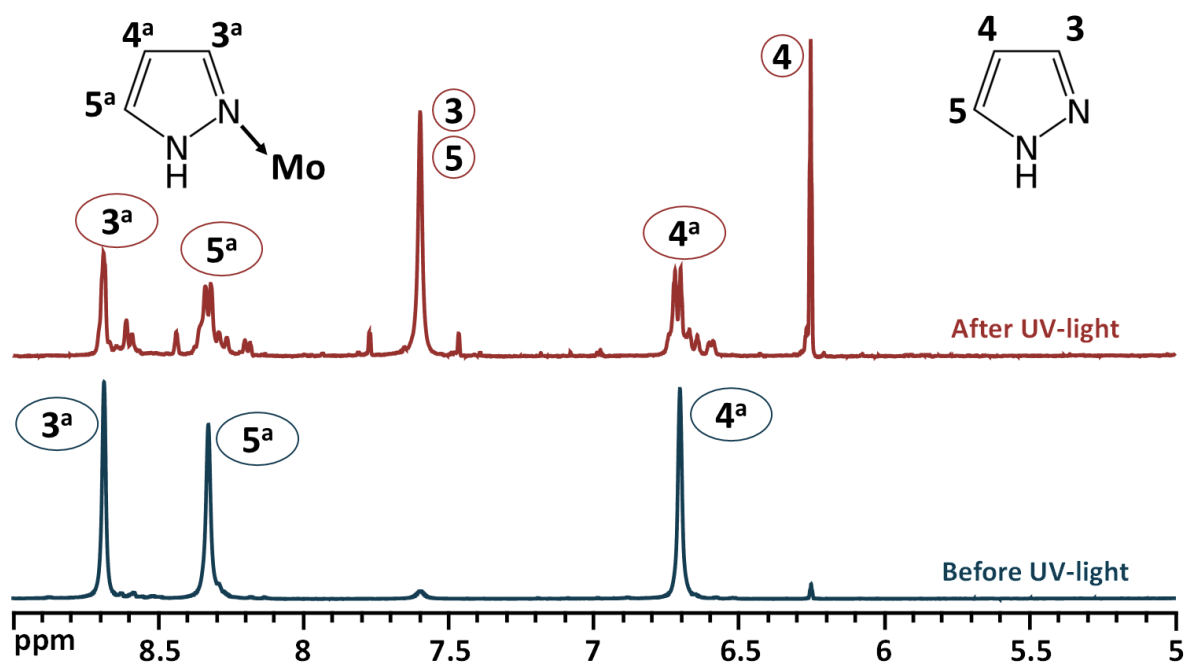

**Figure S10.**  $^1\text{H}$  NMR spectra of DMSO- $d_6$  solution of compound **4** before and after UV irradiation ( $\lambda = 365$  nm).



## TGA data and FTIR spectra

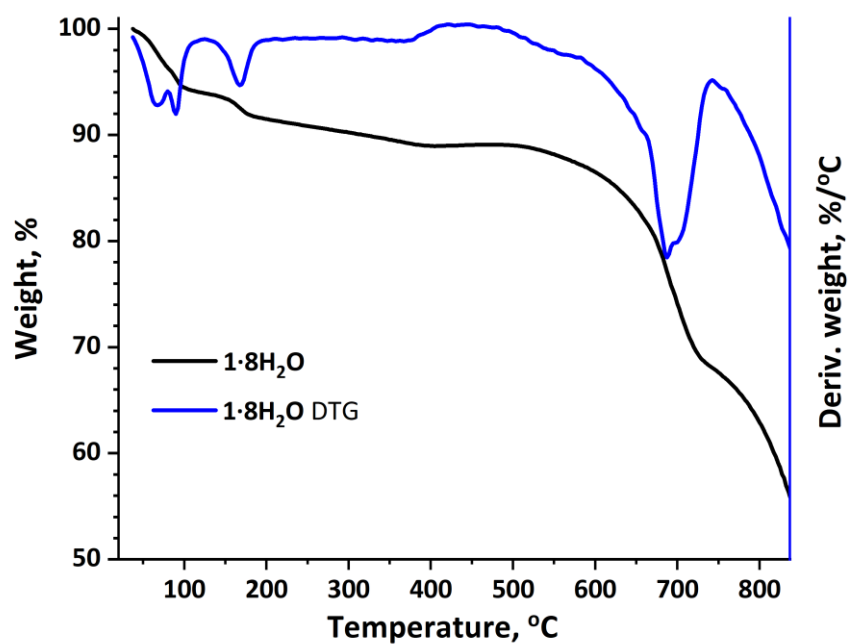

Figure S11. TG and DTG curves of 1·8H<sub>2</sub>O.

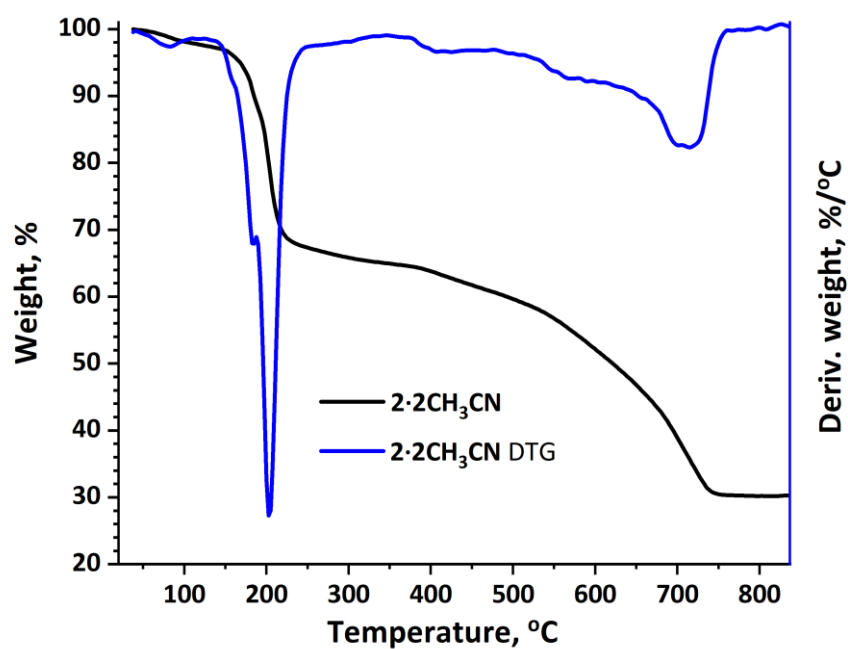

Figure S12. TG and DTG curves of 2·2CH<sub>3</sub>CN.

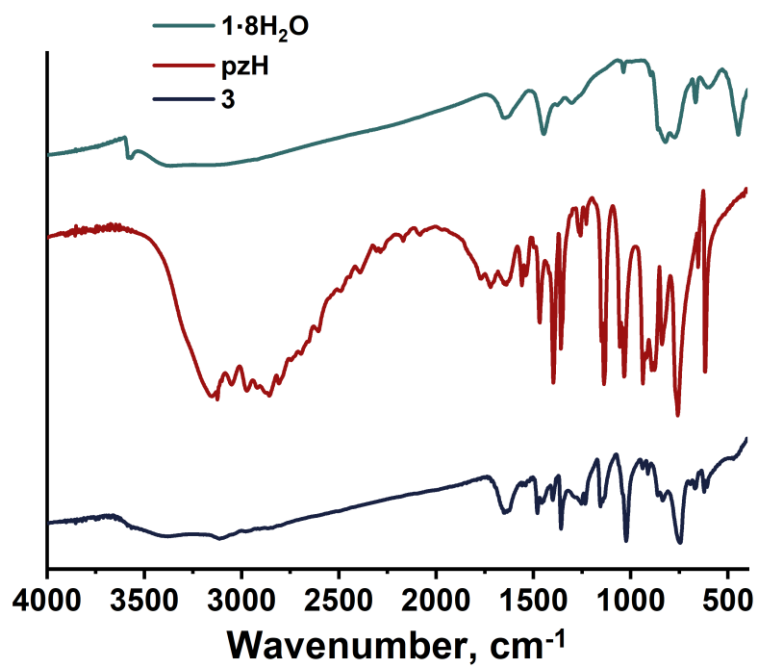

Figure S13. FTIR spectrum of **3** in comparison with pyrazole and 1·8H<sub>2</sub>O.

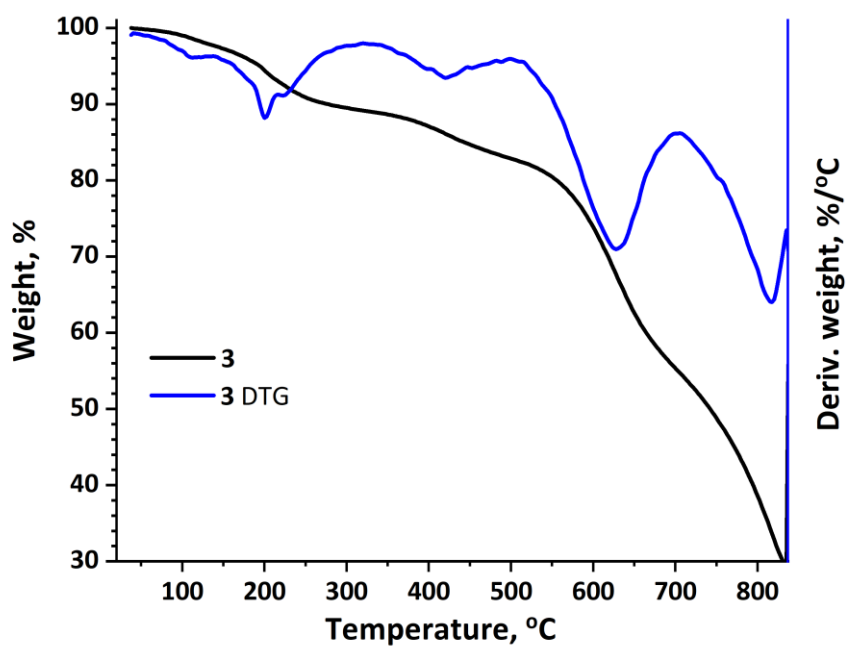

Figure S14. TG and DTG curves of **3**.

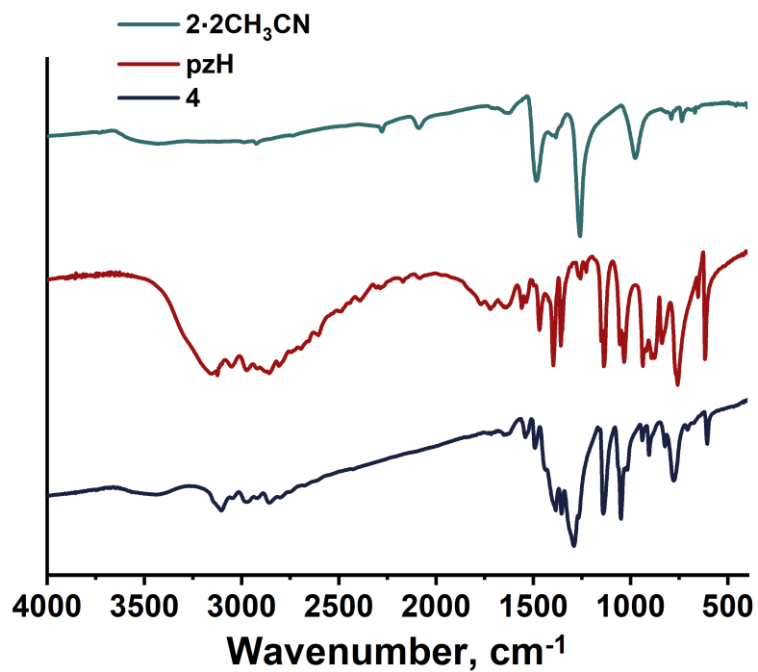

Figure S15. FTIR spectrum of **4** in comparison with pyrazole and 2·2CH<sub>3</sub>CN.

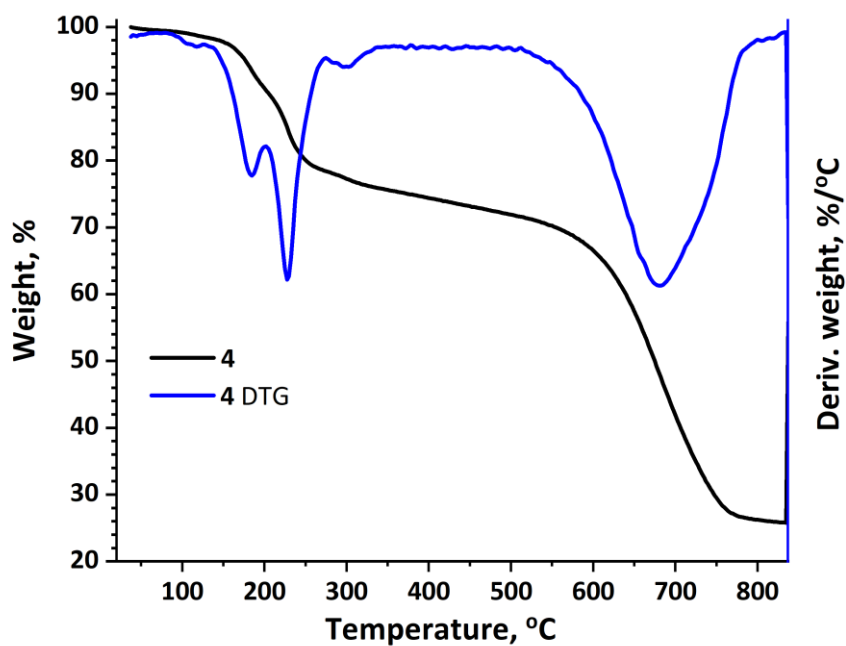

Figure S16. TG and DTG curves of **4**.

## Crystal structure data

**Table S2.** Selected crystallographic parameters of the single-crystal X-ray diffraction structural analysis for  $K_2[Mo_6I_8(OH)_6] \cdot 13H_2O$  (**1·13H<sub>2</sub>O**),  $[Mo_6I_8(H_2O)_6](NO_3)_4 \cdot 2H_2O$  (**2·2H<sub>2</sub>O**),  $K_2[Mo_6I_8(pz)_6] \cdot 6pzH$  (**3·6pzH**),  $[Mo_6I_8(pzH)_6](NO_3)_4 \cdot 4pzH$  (**4·4pzH**).

| Compound                                                                             | <b>1·13H<sub>2</sub>O</b>                                                     | <b>2·2H<sub>2</sub>O</b>                                                      | <b>3·6pzH</b>                                                                                 | <b>4·4pzH</b>                                                                                  |
|--------------------------------------------------------------------------------------|-------------------------------------------------------------------------------|-------------------------------------------------------------------------------|-----------------------------------------------------------------------------------------------|------------------------------------------------------------------------------------------------|
| CCDC                                                                                 | 2363823                                                                       | 2363821                                                                       | 2363822                                                                                       | 2363824                                                                                        |
| Empirical formula                                                                    | H <sub>32</sub> I <sub>8</sub> K <sub>2</sub> Mo <sub>6</sub> O <sub>19</sub> | H <sub>16</sub> I <sub>8</sub> Mo <sub>6</sub> N <sub>4</sub> O <sub>20</sub> | C <sub>36</sub> H <sub>42</sub> I <sub>8</sub> K <sub>2</sub> Mo <sub>6</sub> N <sub>24</sub> | C <sub>30</sub> H <sub>40</sub> I <sub>8</sub> Mo <sub>6</sub> N <sub>24</sub> O <sub>12</sub> |
| Formula weight                                                                       | 2005.29                                                                       | 1983.01                                                                       | 2479.97                                                                                       | 2519.70                                                                                        |
| Temperature, K                                                                       | 220                                                                           | 150                                                                           | 150                                                                                           | 150                                                                                            |
| Crystal system                                                                       | Triclinic                                                                     | Triclinic                                                                     | Trigonal                                                                                      | Monoclinic                                                                                     |
| Space group                                                                          | $P \bar{1}$                                                                   | $P \bar{1}$                                                                   | $R \bar{3}$                                                                                   | $P 2_1/n$                                                                                      |
| <i>a</i> , Å                                                                         | 9.6328(4)                                                                     | 10.5953(2)                                                                    | 17.3571(3)                                                                                    | 11.0559(3)                                                                                     |
| <i>b</i> , Å                                                                         | 11.7341(5)                                                                    | 10.7947(2)                                                                    | 17.3571(3)                                                                                    | 11.5527(3)                                                                                     |
| <i>c</i> , Å                                                                         | 15.9020(7)                                                                    | 15.9552(3)                                                                    | 17.8314(6)                                                                                    | 24.1189(6)                                                                                     |
| $\alpha$ , °                                                                         | 88.590(2)                                                                     | 90.1550(10)                                                                   | 90                                                                                            | 90                                                                                             |
| $\beta$ , °                                                                          | 86.932(2)                                                                     | 90.6780(10)                                                                   | 90                                                                                            | 101.3400(10)                                                                                   |
| $\gamma$ , °                                                                         | 88.658(2)                                                                     | 117.1390(10)                                                                  | 120                                                                                           | 90                                                                                             |
| <i>V</i> , Å <sup>3</sup>                                                            | 1793.88(13)                                                                   | 1623.75(5)                                                                    | 4652.3(2)                                                                                     | 3020.46(14)                                                                                    |
| <i>Z</i>                                                                             | 2                                                                             | 2                                                                             | 3                                                                                             | 2                                                                                              |
| $\rho_{\text{calc}}$ , g/cm <sup>3</sup>                                             | 3.712                                                                         | 4.056                                                                         | 2.656                                                                                         | 2.770                                                                                          |
| $\mu$ , mm <sup>-1</sup>                                                             | 9.207                                                                         | 9.925                                                                         | 5.343                                                                                         | 5.368                                                                                          |
| F (000)                                                                              | 1796                                                                          | 1760                                                                          | 3420                                                                                          | 2320                                                                                           |
| Crystal size                                                                         | 0.07 × 0.08 × 0.03                                                            | 0.24 × 0.18 × 0.16                                                            | 0.08 × 0.07 × 0.03                                                                            | 0.20 × 0.14 × 0.09                                                                             |
| $\Theta$ range for data collection, °                                                | 2.135 to 31.547                                                               | 1.276 to 27.604                                                               | 2.347 to 28.288                                                                               | 2.215 to 34.355                                                                                |
| Index ranges                                                                         | $-14 \leq h \leq 14$<br>$-17 \leq k \leq 17$<br>$-23 \leq l \leq 23$          | $-13 \leq h \leq 13$<br>$-14 \leq k \leq 14$<br>$-20 \leq l \leq 20$          | $-20 \leq h \leq 23$<br>$-23 \leq k \leq 22$<br>$-23 \leq l \leq 23$                          | $-17 \leq h \leq 17$<br>$-18 \leq k \leq 18$<br>$-33 \leq l \leq 38$                           |
| Reflections collected                                                                | 40283                                                                         | 13976                                                                         | 18111                                                                                         | 69472                                                                                          |
| Independent reflections                                                              | 11877 [R <sub>int</sub> = 0.0322]                                             | 7429 [R <sub>int</sub> = 0.0411]                                              | 2572 [R <sub>int</sub> = 0.0369]                                                              | 12673 [R <sub>int</sub> = 0.0496]                                                              |
| Data/restraints/parameters                                                           | 11877/0/317                                                                   | 7429/15/353                                                                   | 2572/0/125                                                                                    | 12673/18/375                                                                                   |
| Goodness-of-fit on F <sup>2</sup>                                                    | 1.036                                                                         | 1.080                                                                         | 1.088                                                                                         | 1.068                                                                                          |
| <i>R</i> <sub>1</sub> / <i>wR</i> <sub>2</sub> ( <i>I</i> > 2 $\sigma$ ( <i>I</i> )) | 0.0279/0.0655                                                                 | 0.0333/0.0817                                                                 | 0.0223/0.0448                                                                                 | 0.0306/0.0586                                                                                  |
| <i>R</i> <sub>1</sub> / <i>wR</i> <sub>2</sub> (all data)                            | 0.0363/0.0681                                                                 | 0.0369/0.0836                                                                 | 0.0325/0.0467                                                                                 | 0.0505/0.0617                                                                                  |
| $\Delta\rho_{\text{max}}/\Delta\rho_{\text{min}}$ (e·Å <sup>-3</sup> )               | 2.546/−2.540                                                                  | 1.448/−1.745                                                                  | 0.571/−0.532                                                                                  | 1.377/−1.271                                                                                   |

## References

1. M. A. Mikhaylov, P. A. Abramov, V. Y. Komarov and M. N. Sokolov, *Polyhedron*, 2017, **122**, 241-246.
2. M. V. Marchuk, N. A. Vorotnikova, Y. A. Vorotnikov, N. V. Kuratieva, D. V. Stass and M. A. Shestopalov, *Dalton Trans.*, 2021, **50**, 8794-8802.
3. M. A. Mikhaylov, A. S. Berezin, T. S. Sukhikh, D. G. Sheven', N. B. Kompankov and M. N. Sokolov, *J. Struct. Chem.*, 2022, **63**, 2101-2112.
4. A. A. Ulantikov, K. D. Podolets, T. S. Sukhikh, Y. V. Mironov, K. A. Brylev and Y. M. Gayfulin, *Polyhedron*, 2024, **247**, 116737.
5. A. D. Mironova, M. A. Mikhailov, K. A. Brylev, A. L. Gushchin, T. S. Sukhikh and M. N. Sokolov, *New J. Chem.*, 2020, **44**, 20620-20625.
6. A. Mironova, A. Gushchin, P. Abramov, I. Eltsov, A. Ryadun and M. Sokolov, *Polyhedron*, 2021, **205**, 115282.
